# Supplementary material
Source: HighWire-hosted journal article supplement (https://sit.bmj.com/highwire/filestream/170/field_highwire_adjunct_files/2/bmjsit-2020-000054supp003_data_supplement.pdf)
Supplement: bmjsit-2020-000054supp003_data_supplement.pdf [file bmjsit-2020-000054supp003_data_supplement.pdf]

| Supplement Table 2: Review of Type 3 Endoleaks within existing literature |                      |                           |                                                                |
|---------------------------------------------------------------------------|----------------------|---------------------------|----------------------------------------------------------------|
| Era                                                                       | Type 3 Endoleak Rate | Duration of Follow-Up     | Literature Type and Source                                     |
| 1990s                                                                     | 17%                  | Variable - Mean 18 months | Single Site Retrospective Review - Martin et al. <sup>14</sup> |
| 2003 - 2008                                                               | 1.9%                 | Variable - Mean 2 years   | Retrospective Series - Tadros et al. <sup>15</sup>             |
| 2009-2014                                                                 | 3%                   | Variable - Mean 6.2 years | Randomized Trial (OVER) - Lal et al. <sup>16</sup>             |
| 2017                                                                      | 2.6%                 | Variable - Mean 5.6 years | Single Site Retrospective Review - Maleux et al. <sup>17</sup> |
| 2003-2018                                                                 | 1.1%                 | Variable - Mean 1.8 years | Current Multi-Site Registry                                    |
